# Supplementary material for: Silver complexes of 1,1′,3,3′-tetrakis(pyrazol-1-yl)propane: the “quadruple pyrazolyl embrace” as a supramolecular synthonElectronic supplementary information (ESI) available: two possible representations of the coordination sphere about Ag(2a) in 2·CH3CN. See http://www.rsc.org/suppdata/dt/b3/b301635h/
Source: Royal Society of Chemistry journal article supplement (doi:10.1039/b301635h), 2003-04-02
Supplement: b301635h.doc [file b301635h.doc]

**Supplementary Information**

Figure S1 depicts two orientations that emphasize the distortion from either of the idealized pentacoordinated geometries. If one chooses the approximation of a distorted square pyramid where O(1), O(4), O(5), and N(41) define the basal plane, then the silver atom resides 0.75 Å from the centroid in the direction of N(31). Moreover, the atoms in this so-defined basal plane represent the corners of an irregular polygon rather than the corners of a square as would be expected for an ideal case. On the other hand, if the distorted trigonal bipyramid convention is chosen, the best representation is such that N(31), O(1), and O(5) define the equatorial plane from which the silver atom is disposed 0.5 Å from the centroid in the direction of N(41). The atoms that would define the axial element of the trigonal bipyramid [N(41), Ag(2a), and O(4)] deviate from the idealized colinearity by 29.5o in the direction of O(5).


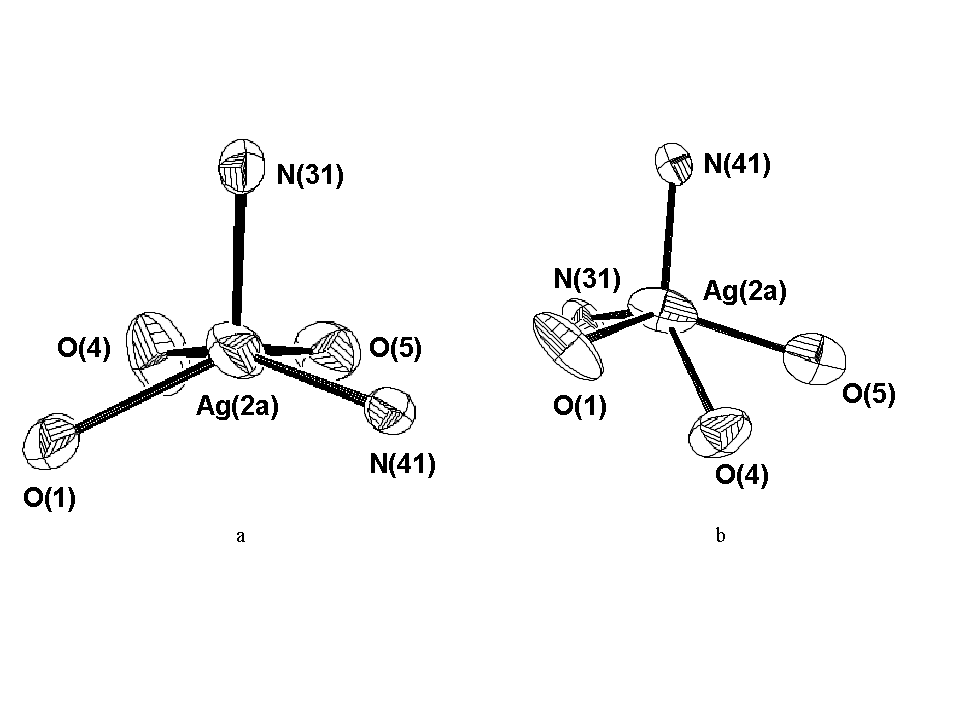


**Fig. S1** Two possible representations of the coordination sphere about Ag(2a) a) distorted square pyramid and b) distorted trigonal bipyramid.

Table 2. Summary of Data obtained from Crystallographic Data Collecion and Structure Refinements.

|  | [Ag2(-C3H4(pz)4)2](SO3CF3)2, 1 | {Ag3[-C3H4(pz)4]2(CH3CN)(NO3)3}·(CH3CN)2, 2·CH3CN |
| --- | --- | --- |
| Empirical formula | C32H32Ag2F6N16O6S2 | C36H41Ag3N22O9 |
| Formula weight | 1130.60 | 1249.52 |
| Temperature (K) | 220.0(2) K | 150.0(2) |
| Wavelength (Å) | 0.71073 | 0.71073 |
| Crystal system | Triclinic | Monoclinic |
| Space group | P-1 | C2/c |
| Unit cell dimensions |  |  |
| a (Å) | 9.8259(5) | 21.7230(15) |
| b (Å) | 10.4688(5) | 14.9693(10) Å |
| c (Å) | 12.3726(6) | 14.8892(10) Å |
|  | 96.8090(10) | 90 |
|  | 111.2290(10) | 94.9640(10) |
|  | 107.9600(10) | 90 |
| Volume (Å3) | 1089.84(9) | 4823.5(6) |
| Z | 2 | 4 |
|  (calculated) (g/cm3) | 1.723 | 1.721 |
| Absorption coefficient (mm-1) | 1.082 | 1.281 |
| F(000) | 564 | 2496 |
| Crystal size (mm3) | 0.36 x 0.32 x 0.26 | 0.52 x 0.48 x 0.28 |
|  range (deg) for data collection | 1.83 to 26.39 | 1.65 to 25.04 |
| Index ranges | -12<=h<=12, -13<=k<=13, -15<=l<=15 | -25<=h<=21, -17<=k<=15, -17<=l<=17 |
| Reflections collected | 9992 | 16502 |
| Independent reflections | 4444 [R(int) = 0.0228] | 4259 [R(int) = 0.0300] |
| Completeness to  | (= 26.39°) 99.6 | (= 25.04°) 99.8 % |
| Absorption correction | None | Semi-empirical from equivalents |
| Max. and min. transmission | 0.7728 and 0.6166 | 0.5816 and 0.3502 |
| Refinement method | Full-matrix least-squares on F2 | Full-matrix least-squares on F2 |
| Data / restraints / parameters | 4444 / 7 / 363 | 4259 / 9 / 363 |
| Goodness-of-fit on F2 | 1.015 | 1.027 |
| Final R indices [I>2(I)] | R1 = 0.0327, wR2 = 0.0683 | R1 = 0.0374, wR2 = 0.0955 |
| R indices (all data) | R1 = 0.0393, wR2 = 0.0696 | R1 = 0.0446, wR2 = 0.0987 |
| Extinction coefficient | none | 0.00033(8) |
| Largest diff. peak and hole (e Å3) | 0.447 and -0.419 | 0.718 and -0.963 |
